# Supplementary material
Source: PubMed Central journal article supplement (PMC1618104)
Supplement: 7601368s3.pdf [file 7601368s3.pdf]

| wt    | 100% |
|-------|------|
| S11A  | 20%  |
| N43A  | 15%  |
| K46A  | 100% |
| D50A  | 35%  |
| R51A  | 12%  |
| K58A  | 0%   |
| K72A  | 12%  |
| R75A  | 4%   |
| K82A  | 1%   |
| S85A  | 3%   |
| D99A  | 20%  |
| D161A | 30%  |
| R190A | 20%  |
| Q198A | 39%  |

**Supplementary Figure 3.** Wt and mutant nsp8 polymerase specific activities. Activity was assayed using a poly (rC) template to monitor the incorporation of [<sup>3</sup>H]GMP into RNA. RNA synthesis was quantitated using the filter paper binding assay (see “Material and methods”). Each mutant was assayed three time independently, and the observed standard deviation was < 20% (see “Material and methods”).
