# Supplementary material
Source: PubMed Central journal article supplement (PMC1618104)
Supplement: 7601368s4.pdf [file 7601368s4.pdf]

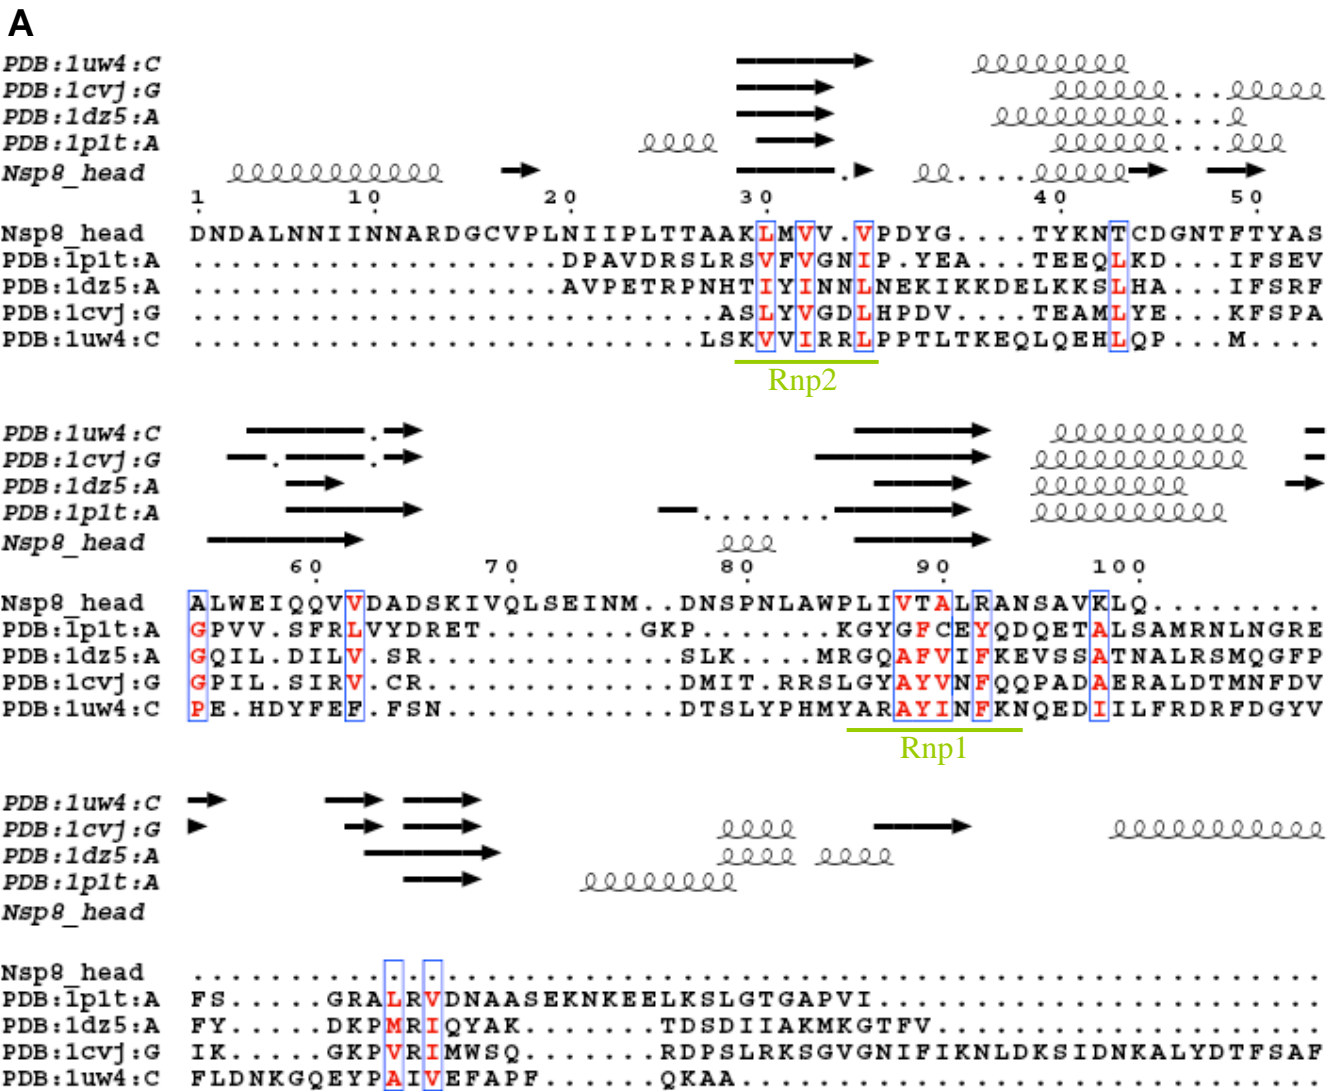

**B**

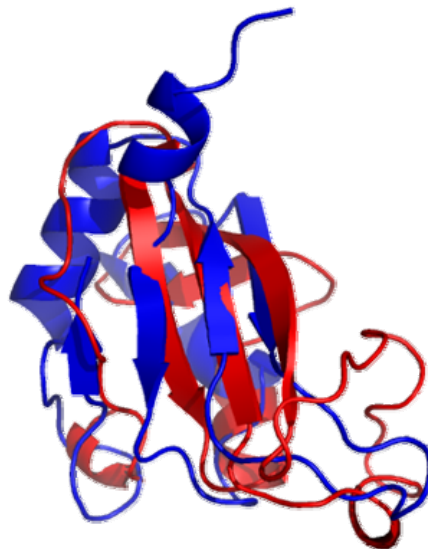

**Supplementary Figure 4. A.** Structural alignment of several RNA-binding domain proteins (RBD) with nsp8 head domain. Secondary structure elements are indicated above the alignment. The two ssRNA recognition motifs Rnp1 and Rnp2 are indicated in green. **B.** Superimposition of the head of nsp8 protein (in blue) with CstF-64 protein, PDB code: 1plt (in red).
