# Supplementary material
Source: PubMed Central journal article supplement (PMC1618104)
Supplement: 7601368s5.pdf [file 7601368s5.pdf]

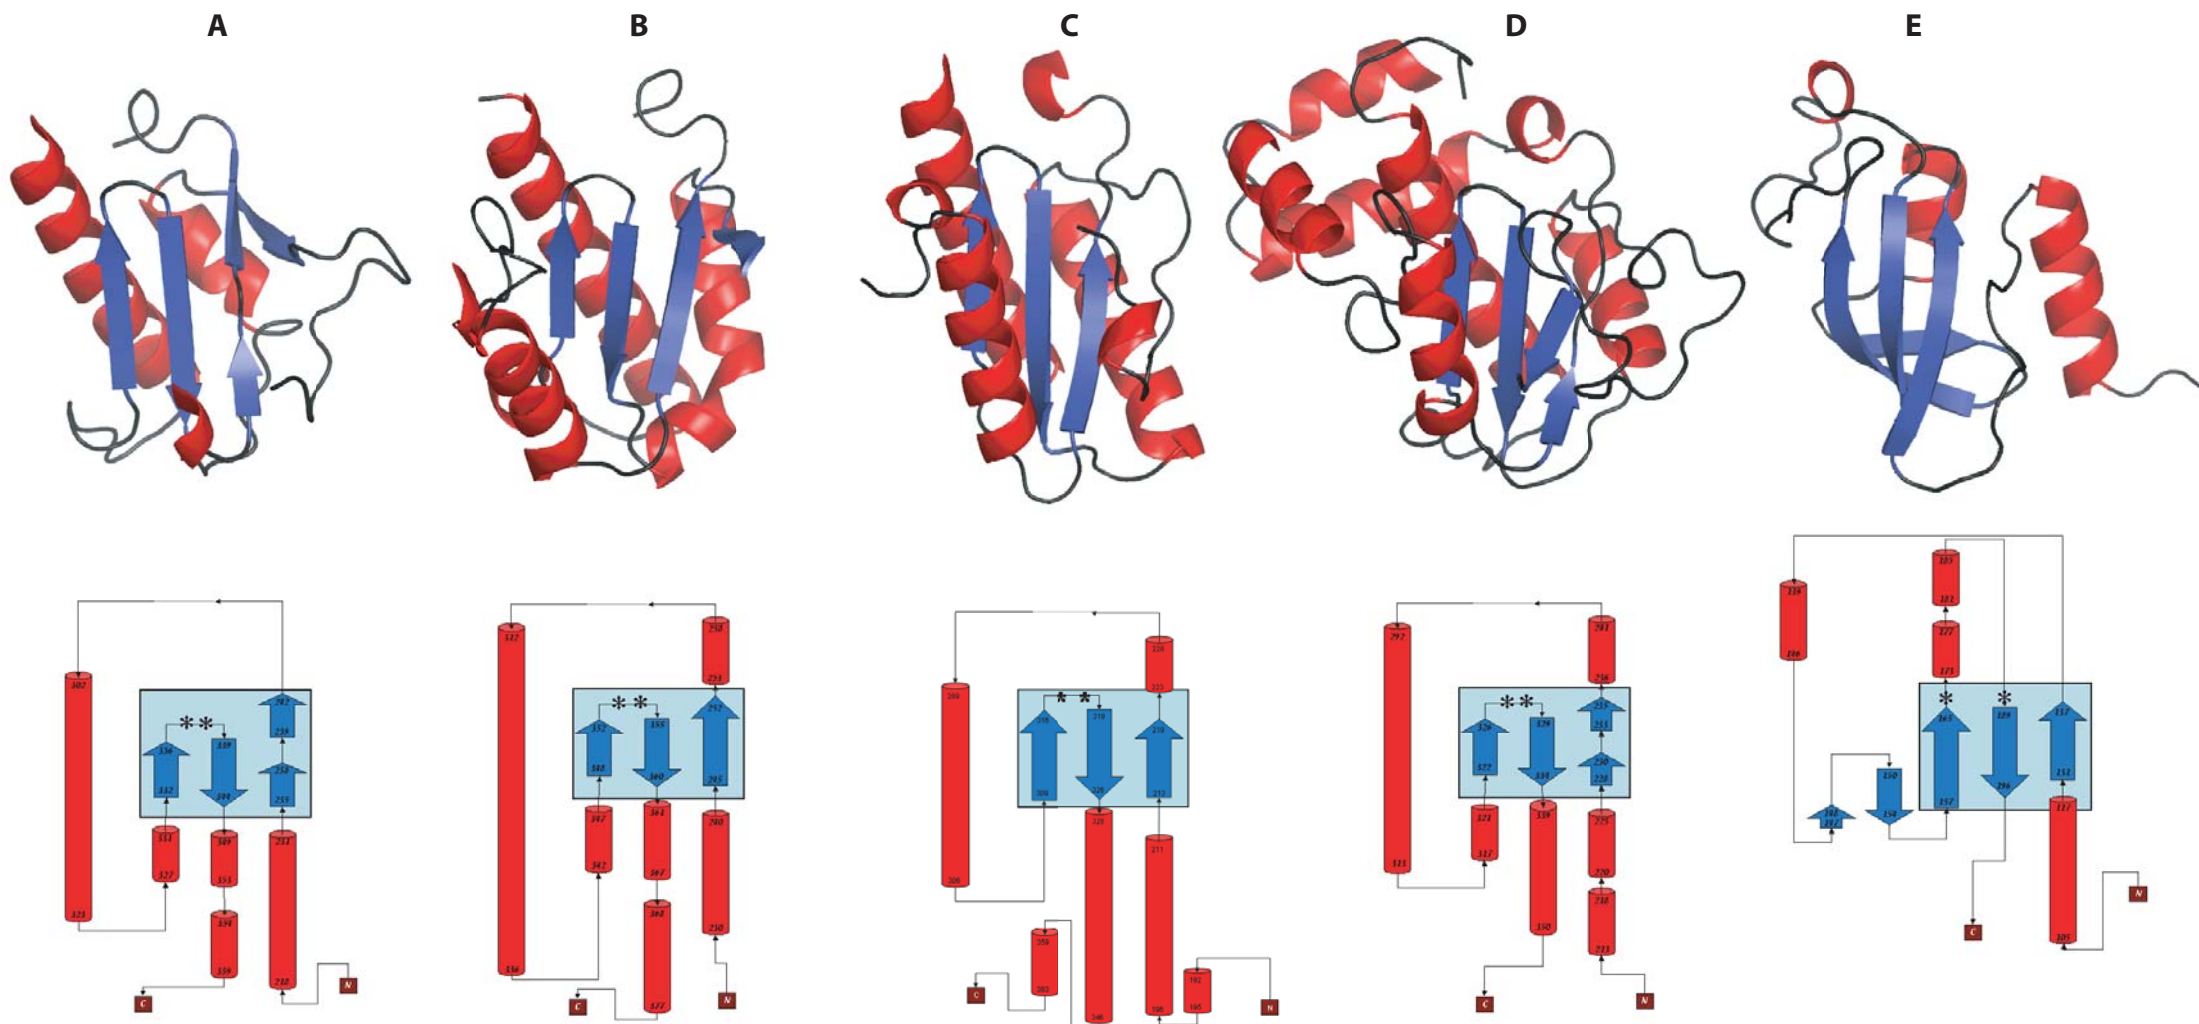

**Supplementary Figure 5. Structural and topology comparison between RNA-dependent RNA polymerases palm subdomains and nsp8 head domain.**

(A) Foot and Mouth virus RNA-dependent RNA polymerase palm subdomain (PDB 1WNE) (B) Rabbit Hemorrhagic disease virus RNA-dependent RNA polymerase palm subdomain (PDB 1KHW) (C) Hepatitis C virus NS5B RNA-dependent RNA polymerase palm subdomain (PDB 1GX5) (D) Poliovirus polymerase palm subdomain (PDB 1RA7) and (E) nsp8 head domain (PDB 2AHM). \*, catalytic residues (DD) of RNA-dependent RNA polymerases (panel A, B, C and D) and putative catalytic site residues for the nsp8 polymerase (panel E), see discussion. Blue boxes show structural homology.
